# Supplementary material
Source: PubMed Central journal article supplement (PMC5573618)
Supplement: NIHMS875412-supplement-Supplemental_Data_File___doc___tif__pdf__etc___1.pdf [file NIHMS875412-supplement-Supplemental_Data_File___doc___tif__pdf__etc___1.pdf]

|    |       |          | Time point (h) | [Succinate], uM | [lactate], mM |
|----|-------|----------|----------------|-----------------|---------------|
| 1  | C-001 | Dead     | ED             | 350.90          | 5.99          |
| 2  | C-002 | Survived | Field          | 11.48           | 3.22          |
| 3  | C-002 | Survived | ED             | 9.90            | 3.11          |
| 4  | C-002 | Survived | 2.0            | 8.49            | 3.22          |
| 5  | C-002 | Survived | 4.0            | 8.79            | 2.53          |
| 6  | C-002 | Survived | 24.0           | 11.80           | 2.79          |
| 7  | C-002 | Survived | 48.0           | 9.69            | 3.55          |
| 8  | C-002 | Survived | 72.0           | 7.00            | 3.35          |
| 9  | C-002 | Survived | 120.0          | 10.15           | 2.41          |
| 10 | C-002 | Survived | 168.0          | 7.19            | 2.93          |
| 11 | C-003 | Survived | Field          | 8.10            | 3.66          |
| 12 | C-003 | Survived | ED             | 11.59           | 3.31          |
| 13 | C-003 | Survived | 4.0            | 10.04           | 2.89          |
| 14 | C-003 | Survived | 6.0            | 11.92           | 2.75          |
| 15 | C-003 | Survived | 12.0           | 14.69           | 3.08          |
| 16 | C-003 | Survived | 24.0           | 6.82            | 2.57          |
| 17 | C-004 | Survived | Field          | 9.94            | 4.05          |
| 18 | C-004 | Survived | ED             | 8.56            | 3.72          |
| 19 | C-004 | Survived | 1.0            | 8.05            | 3.24          |
| 20 | C-004 | Survived | 2.0            | 8.85            | 2.73          |
| 21 | C-004 | Survived | 4.0            | 11.35           | 2.30          |
| 22 | C-004 | Survived | 6.0            | 4.81            | 2.87          |
| 23 | C-004 | Survived | 12.0           | 8.93            | 2.39          |
| 24 | C-004 | Survived | 24.0           | 7.32            | 2.60          |
| 25 | C-005 | Survived | Field          | 12.02           | 4.34          |
| 26 | C-005 | Survived | ED             | 10.67           | 3.51          |
| 27 | C-005 | Survived | 2.0            | 11.16           | 2.71          |
| 28 | C-005 | Survived | 4.0            | 6.51            | 2.60          |
| 29 | C-005 | Survived | 6.0            | 6.08            | 2.46          |
| 30 | C-005 | Survived | 12.0           | 11.39           | 2.46          |
| 31 | C-005 | Survived | 24.0           | 12.63           | 4.39          |
| 32 | C-005 | Survived | 72.0           | 7.98            | 3.14          |
| 33 | C-006 | Survived | ED             | 121.22          | 6.57          |
| 34 | C-006 | Survived | 2.0            | 20.93           | 6.27          |
| 35 | C-006 | Survived | 4.0            | 12.16           | 4.20          |
| 36 | C-006 | Survived | 6.0            | 15.72           | 4.53          |
| 37 | C-006 | Survived | 12.0           | 15.77           | 5.55          |
| 38 | C-006 | Survived | 24.0           | 16.52           | 4.15          |
| 39 | C-006 | Survived | 48.0           | 11.81           | 3.62          |
| 40 | C-006 | Survived | 72.0           | 11.51           | 2.93          |
| 41 | C-006 | Survived | 120.0          | 10.07           | 2.59          |
| 42 | C-007 | Survived | Field          | 24.89           | 7.26          |
| 44 | C-008 | Survived | Field          | 29.01           | 8.17          |

|    |       |          |       |       |      |
|----|-------|----------|-------|-------|------|
| 45 | C-008 | Survived | ED    | 15.67 | 6.95 |
| 46 | C-008 | Survived | 2.0   | 9.74  | 6.18 |
| 47 | C-008 | Survived | 6.0   | 12.81 | 4.94 |
| 48 | C-008 | Survived | 12.0  | 12.55 | 4.92 |
| 49 | C-008 | Survived | 24.0  | 10.56 | 2.85 |
| 50 | C-009 | Survived | Field | 19.41 | 4.39 |
| 51 | C-009 | Survived | ED    | 12.55 | 3.62 |
| 52 | C-009 | Survived | 4.0   | 11.22 | 2.60 |
| 53 | C-009 | Survived | 6.0   | 10.06 | 2.84 |
| 54 | C-009 | Survived | 12.0  | 5.38  | 2.45 |
| 55 | C-009 | Survived | 24.0  | 6.68  | 2.66 |
| 56 | C-009 | Survived | 48.0  | 8.65  | 2.45 |
| 57 | C-009 | Survived | 72.0  | 8.24  | 2.28 |
| 58 | C-009 | Survived | 120.0 | 6.35  | 3.43 |
| 59 | C-009 | Survived | 168.0 | 10.26 | 3.26 |
| 60 | C-010 | Survived | Field | 9.78  | 5.33 |
| 61 | C-010 | Survived | 4.0   | 9.29  | 4.27 |
| 62 | C-010 | Survived | 6.0   | 13.24 | 4.37 |
| 63 | C-010 | Survived | 12.0  | 9.71  | 3.57 |
| 64 | C-010 | Survived | 24.0  | 6.43  | 3.21 |
| 65 | C-010 | Survived | 48.0  | 8.67  | 2.27 |
| 66 | C-010 | Survived | 72.0  | 5.34  | 2.21 |
| 67 | C-010 | Survived | 120.0 | 8.51  | 2.49 |
| 68 | C-010 | Survived | 168.0 | 5.75  | 2.69 |
| 69 | C-011 | Survived | Field | 88.60 | 9.81 |
| 70 | C-011 | Survived | ED    | 45.35 | 5.76 |
| 71 | C-011 | Survived | 2.0   | 7.47  | 4.07 |
| 72 | C-011 | Survived | 4.0   | 17.01 | 4.42 |
| 73 | C-011 | Survived | 6.0   | 8.46  | 3.68 |
| 74 | C-011 | Survived | 12.0  | 12.76 | 3.71 |
| 75 | C-011 | Survived | 24.0  | 10.43 | 3.00 |
| 76 | C-011 | Survived | 48.0  | 8.26  | 2.73 |
| 77 | C-011 | Survived | 72.0  | 13.84 | 2.71 |
| 78 | C-011 | Survived | 120.0 | 15.29 | 3.84 |
| 79 | C-012 | Survived | Field | 7.33  | 3.62 |
| 80 | C-012 | Survived | ED    | 13.06 | 3.39 |
| 81 | C-012 | Survived | 4.0   | 8.66  | 3.40 |
| 82 | C-012 | Survived | 6.0   | 8.99  | 3.56 |
| 83 | C-013 | Survived | Field | 20.67 | 4.27 |
| 84 | C-013 | Survived | ED    | 24.07 | 4.48 |
| 85 | C-013 | Survived | 2.0   | 17.34 | 5.43 |
| 86 | C-013 | Survived | 6.0   | 12.70 | 4.44 |
| 87 | C-013 | Survived | 12.0  | 10.25 | 4.98 |
| 88 | C-013 | Survived | 24.0  | 9.87  | 3.30 |

|     |       |          |       |        |       |
|-----|-------|----------|-------|--------|-------|
| 89  | C-013 | Survived | 48.0  | 12.08  | 2.50  |
| 90  | C-013 | Survived | 72.0  | 10.34  | 2.42  |
| 91  | C-013 | Survived | 120.0 | 8.08   | 2.45  |
| 92  | C-013 | Survived | 168.0 | 6.26   | 2.41  |
| 93  | C-014 | Dead     | Field | 261.59 | 11.54 |
| 94  | C-014 | Dead     | ED    | 382.31 | 11.63 |
| 95  | C-015 | Survived | Field | 251.22 | 12.86 |
| 96  | C-015 | Survived | ED    | 82.92  | 7.75  |
| 97  | C-015 | Survived | 4.0   | 9.41   | 6.79  |
| 98  | C-015 | Survived | 6.0   | 8.67   | 4.92  |
| 99  | C-015 | Survived | 12.0  | 9.89   | 4.58  |
| 100 | C-015 | Survived | 24.0  | 8.37   | 2.64  |
| 101 | C-015 | Survived | 72.0  | 7.20   | 2.50  |
| 102 | C-016 | Survived | Field | 17.28  | 5.02  |
| 103 | C-016 | Survived | ED    | 10.07  | 4.73  |
| 104 | C-016 | Survived | 2.0   | 14.88  | 5.79  |
| 105 | C-016 | Survived | 4.0   | 9.95   | 4.94  |
| 106 | C-016 | Survived | 6.0   | 7.52   | 5.09  |
| 107 | C-016 | Survived | 12.0  | 8.20   | 4.02  |
| 108 | C-016 | Survived | 24.0  | 10.72  | 3.27  |
| 109 | C-016 | Survived | 48.0  | 10.23  | 2.74  |
| 110 | C-016 | Survived | 72.0  | 6.95   | 3.17  |
| 111 | C-016 | Survived | 120.0 | 12.39  | 3.54  |
| 112 | C-016 | Survived | 168.0 | 9.92   | 2.87  |
| 113 | C-017 | Survived | Field | 21.64  | 4.19  |
| 114 | C-017 | Survived | ED    | 29.69  | 4.65  |
| 115 | C-017 | Survived | 2.0   | 12.40  | 4.67  |
| 116 | C-017 | Survived | 4.0   | 14.73  | 3.85  |
| 117 | C-017 | Survived | 6.0   | 10.47  | 3.43  |
| 118 | C-017 | Survived | 12.0  | 7.68   | 4.03  |
| 119 | C-017 | Survived | 24.0  | 7.65   | 3.42  |
| 120 | C-017 | Survived | 48.0  | 8.04   | 2.72  |
| 121 | C-017 | Survived | 72.0  | 6.51   | 2.86  |
| 122 | C-017 | Survived | 120.0 | 6.73   | 2.57  |
| 123 | C-017 | Survived | 168.0 | 6.58   | 3.02  |
| 124 | C-018 | Survived | Field | 12.21  | 4.21  |
| 125 | C-018 | Survived | ED    | 8.91   | 4.04  |
| 126 | C-018 | Survived | 2.0   | 11.81  | 3.47  |
| 127 | C-018 | Survived | 4.0   | 9.03   | 3.50  |
| 128 | C-019 | Survived | Field | 18.66  | 3.86  |
| 129 | C-019 | Survived | ED    | 20.95  | 4.40  |
| 130 | C-019 | Survived | 2.0   | 24.08  | 10.59 |
| 131 | C-019 | Survived | 4.0   | 5.45   | 6.28  |
| 132 | C-019 | Survived | 6.0   | 7.80   | 7.77  |

|     |       |          |       |       |      |
|-----|-------|----------|-------|-------|------|
| 133 | C-019 | Survived | 12.0  | 7.43  | 7.45 |
| 134 | C-019 | Survived | 24.0  | 9.39  | 4.69 |
| 135 | C-019 | Survived | 48.0  | 9.34  | 3.56 |
| 136 | C-019 | Survived | 72.0  | 7.02  | 2.86 |
| 137 | C-019 | Survived | 120.0 | 8.45  | 2.85 |
| 138 | C-019 | Survived | 168.0 | 10.02 | 2.59 |
| 139 | C-020 | Survived | Field | 46.04 | 6.14 |
| 140 | C-020 | Survived | ED    | 44.08 | 6.45 |
| 141 | C-020 | Survived | 2.0   | 10.39 | 7.41 |
| 142 | C-020 | Survived | 4.0   | 8.48  | 6.45 |
| 143 | C-020 | Survived | 6.0   | 6.38  | 5.76 |
| 144 | C-020 | Survived | 12.0  | 11.58 | 4.55 |
| 145 | C-020 | Survived | 24.0  | 7.28  | 7.98 |
| 146 | C-020 | Survived | 48.0  | 7.83  | 3.80 |
| 147 | C-020 | Survived | 72.0  | 11.84 | 3.48 |
| 148 | C-020 | Survived | 120.0 | 10.41 | 2.83 |
| 149 | C-020 | Survived | 168.0 | 6.73  | 2.59 |
| 150 | C-021 | Survived | Field | 13.25 | 4.33 |
| 151 | C-021 | Survived | ED    | 12.73 | 3.28 |
| 152 | C-021 | Survived | 4.0   | 17.54 | 3.38 |
| 153 | C-021 | Survived | 6.0   | 8.51  | 3.28 |
| 154 | C-021 | Survived | 12.0  | 9.19  | 3.31 |
| 155 | C-022 | Survived | Field | 75.04 | 5.37 |
| 156 | C-022 | Survived | ED    | 48.44 | 5.02 |
| 157 | C-022 | Survived | 2.0   | 21.73 | 3.90 |
| 158 | C-022 | Survived | 4.0   | 13.79 | 4.00 |
| 159 | C-022 | Survived | 6.0   | 19.05 | 5.00 |
| 160 | C-022 | Survived | 12.0  | 5.95  | 5.14 |
| 161 | C-022 | Survived | 24.0  | 12.41 | 3.31 |
| 162 | C-022 | Survived | 168.0 | 10.53 | 2.73 |
| 163 | C-023 | Survived | Field | 13.09 | 4.95 |
| 164 | C-023 | Survived | ED    | 9.60  | 3.49 |
| 165 | C-023 | Survived | 2.0   | 12.36 | 3.42 |
| 166 | C-023 | Survived | 6.0   | 11.16 | 4.12 |
| 167 | C-023 | Survived | 12.0  | 6.30  | 3.85 |
| 168 | C-023 | Survived | 24.0  | 11.15 | 2.78 |
| 169 | C-024 | Survived | 72.0  | 11.98 | 3.48 |
| 170 | X-025 | Dead     | ED    | 24.13 | 5.36 |
| 171 | X-025 | Dead     | 2.0   | 23.61 | 4.37 |
| 172 | X-025 | Dead     | 4.0   | 13.36 | 2.99 |
| 173 | X-025 | Dead     | 6.0   | 11.14 | 2.98 |
| 174 | X-025 | Dead     | 12.0  | 13.06 | 3.49 |
| 175 | C-026 | Survived | Field | 15.74 | 4.92 |
| 176 | C-026 | Survived | ED    | 22.38 | 5.86 |

|     |       |          |       |       |       |
|-----|-------|----------|-------|-------|-------|
| 177 | C-026 | Survived | 2.0   | 9.05  | 5.59  |
| 178 | C-026 | Survived | 4.0   | 6.13  | 5.12  |
| 179 | C-026 | Survived | 6.0   | 10.44 | 6.18  |
| 180 | C-026 | Survived | 12.0  | 9.81  | 5.04  |
| 181 | C-026 | Survived | 24.0  | 7.92  | 3.68  |
| 182 | C-026 | Survived | 48.0  | 11.31 | 3.51  |
| 183 | C-026 | Survived | 72.0  | 11.45 | 3.11  |
| 184 | C-026 | Survived | 120.0 | 8.82  | 2.77  |
| 185 | C-026 | Survived | 168.0 | 9.97  | 3.34  |
| 186 | C-028 | Survived | Field | 15.42 | 4.80  |
| 187 | C-028 | Survived | 48.0  | 5.96  | 3.17  |
| 188 | C-029 | Survived | Field | 19.90 | 5.27  |
| 189 | C-029 | Survived | ED    | 10.39 | 3.98  |
| 190 | C-029 | Survived | 2.0   | 15.13 | 3.95  |
| 191 | C-029 | Survived | 4.0   | 18.79 | 3.62  |
| 192 | C-029 | Survived | 6.0   | 9.82  | 3.30  |
| 193 | C-029 | Survived | 12.0  | 8.86  | 3.05  |
| 194 | C-029 | Survived | 24.0  | 6.09  | 3.36  |
| 195 | C-029 | Survived | 48.0  | 10.56 | 2.99  |
| 196 | C-029 | Survived | 72.0  | 8.51  | 3.15  |
| 197 | C-029 | Survived | 120.0 | 9.38  | 2.41  |
| 198 | C-029 | Survived | 168.0 | 8.97  | 2.49  |
| 199 | C-030 | Survived | Field | 29.91 | 11.31 |
| 200 | C-030 | Survived | ED    | 17.12 | 5.80  |
| 201 | C-030 | Survived | 4.0   | 12.33 | 4.23  |
| 202 | C-030 | Survived | 6.0   | 6.68  | 3.41  |
| 203 | C-030 | Survived | 12.0  | 9.36  | 3.23  |
| 204 | C-030 | Survived | 24.0  | 7.58  | 2.85  |
| 205 | C-030 | Survived | 48.0  | 7.38  | 2.38  |
| 206 | C-030 | Survived | 72.0  | 8.84  | 2.19  |
| 207 | C-030 | Survived | 120.0 | 10.23 | 2.35  |
| 208 | C-031 | Survived | Field | 9.81  | 2.91  |
| 209 | C-031 | Survived | ED    | 12.76 | 3.03  |
| 210 | C-031 | Survived | 4.0   | 6.77  | 2.46  |
| 211 | C-031 | Survived | 6.0   | 9.77  | 2.50  |
| 212 | C-031 | Survived | 12.0  | 8.57  | 2.50  |
| 213 | C-031 | Survived | 24.0  | 6.25  | 2.61  |
| 214 | C-032 | Survived | ED    | 8.54  | 6.44  |
| 215 | C-032 | Survived | 2.0   | 14.33 | 4.38  |
| 216 | C-032 | Survived | 4.0   | 9.25  | 3.83  |
| 217 | C-032 | Survived | 6.0   | 8.06  | 3.50  |
| 218 | C-032 | Survived | 120.0 | 12.38 | 2.61  |
| 219 | C-033 | Survived | Field | 17.02 | 4.89  |
| 220 | C-033 | Survived | ED    | 13.66 | 4.42  |

|     |       |          |       |       |       |
|-----|-------|----------|-------|-------|-------|
| 221 | C-033 | Survived | 2.0   | 8.58  | 4.52  |
| 222 | C-033 | Survived | 4.0   | 11.41 | 4.00  |
| 223 | C-033 | Survived | 6.0   | 5.26  | 3.10  |
| 224 | C-033 | Survived | 12.0  | 11.64 | 3.28  |
| 225 | C-033 | Survived | 24.0  | 10.25 | 2.55  |
| 226 | C-033 | Survived | 48.0  | 9.19  | 2.54  |
| 227 | C-033 | Survived | 72.0  | 9.92  | 2.56  |
| 228 | C-034 | Survived | Field | 15.75 | 3.43  |
| 229 | C-034 | Survived | ED    | 16.80 | 3.21  |
| 230 | C-034 | Survived | 2.0   | 14.21 | 2.48  |
| 231 | C-034 | Survived | 4.0   | 9.11  | 2.87  |
| 232 | C-034 | Survived | 6.0   | 11.85 | 2.92  |
| 233 | C-034 | Survived | 12.0  | 6.79  | 2.97  |
| 234 | C-034 | Survived | 24.0  | 8.00  | 2.51  |
| 235 | C-034 | Survived | 48.0  | 8.10  | 2.42  |
| 236 | C-034 | Survived | 72.0  | 6.97  | 2.61  |
| 237 | C-035 | Survived | ED    | 53.33 | 8.98  |
| 238 | C-035 | Survived | 2.0   | 11.94 | 4.97  |
| 239 | C-035 | Survived | 6.0   | 9.42  | 4.22  |
| 240 | C-035 | Survived | 12.0  | 5.71  | 2.61  |
| 241 | C-035 | Survived | 24.0  | 8.09  | 2.75  |
| 242 | C-035 | Survived | 48.0  | 9.25  | 2.81  |
| 243 | C-035 | Survived | 72.0  | 9.49  | 2.34  |
| 244 | C-036 | Survived | ED    | 66.00 | 4.89  |
| 245 | C-036 | Survived | 2.0   | 20.04 | 3.13  |
| 246 | C-036 | Survived | 4.0   | 13.16 | 3.72  |
| 247 | C-036 | Survived | 6.0   | 20.24 | 3.69  |
| 248 | C-036 | Survived | 12.0  | 22.40 | 3.31  |
| 249 | C-036 | Survived | 24.0  | 13.41 | 3.07  |
| 250 | C-036 | Survived | 48.0  | 8.21  | 2.57  |
| 251 | C-036 | Survived | 72.0  | 5.61  | 2.13  |
| 252 | C-036 | Survived | 120.0 | 10.15 | 2.43  |
| 253 | C-036 | Survived | 168.0 | 10.86 | 2.83  |
| 254 | C-037 | Survived | Field | 48.61 | 10.93 |
| 255 | C-037 | Survived | ED    | 22.47 | 8.37  |
| 256 | C-037 | Survived | 2.0   | 14.20 | 3.78  |
| 257 | C-037 | Survived | 4.0   | 14.30 | 3.27  |
| 258 | C-038 | Survived | ED    | 19.05 | 4.12  |
| 259 | C-038 | Survived | 4.0   | 11.73 | 3.01  |
| 260 | C-038 | Survived | 12.0  | 11.96 | 2.75  |
| 261 | C-038 | Survived | 24.0  | 10.38 | 2.66  |
| 266 | C-041 | Survived | Field | 22.30 | 4.41  |
| 267 | C-041 | Survived | ED    | 16.21 | 2.98  |
| 268 | C-041 | Survived | 2.0   | 10.04 | 3.68  |

|     |       |          |       |        |       |
|-----|-------|----------|-------|--------|-------|
| 269 | C-041 | Survived | 4.0   | 10.10  | 2.92  |
| 270 | C-041 | Survived | 6.0   | 9.01   | 3.04  |
| 271 | C-042 | Survived | ED    | 26.09  | 4.87  |
| 272 | C-042 | Survived | 2.0   | 10.66  | 5.59  |
| 273 | C-042 | Survived | 4.0   | 12.33  | 4.21  |
| 274 | C-042 | Survived | 6.0   | 14.30  | 3.55  |
| 275 | C-042 | Survived | 12.0  | 7.74   | 3.78  |
| 276 | C-042 | Survived | 24.0  | 6.03   | 2.74  |
| 277 | C-042 | Survived | 48.0  | 6.44   | 2.78  |
| 278 | C-042 | Survived | 72.0  | 8.53   | 2.96  |
| 279 | C-042 | Survived | 120.0 | 7.42   | 2.72  |
| 280 | C-043 | Dead     | Field | 115.59 | 9.56  |
| 281 | C-043 | Dead     | ED    | 248.88 | 10.01 |
| 282 | C-044 | Survived | ED    | 43.80  | 4.76  |
| 283 | C-044 | Survived | 2.0   | 18.46  | 4.52  |
| 284 | C-044 | Survived | 4.0   | 29.05  | 4.13  |
| 285 | C-044 | Survived | 6.0   | 19.97  | 4.53  |
| 286 | C-044 | Survived | 12.0  | 16.52  | 4.18  |
| 287 | C-044 | Survived | 24.0  | 18.89  | 3.44  |
| 288 | C-044 | Survived | 48.0  | 6.89   | 2.99  |
| 289 | C-044 | Survived | 120.0 | 5.35   | 2.36  |
| 290 | C-044 | Survived | 168.0 | 9.21   | 2.53  |
| 291 | C-045 | Survived | ED    | 28.04  | 5.09  |
| 292 | C-045 | Survived | 2.0   | 14.48  | 5.23  |
| 293 | C-045 | Survived | 4.0   | 13.62  | 5.14  |
| 294 | C-045 | Survived | 6.0   | 8.29   | 4.00  |
| 295 | C-045 | Survived | 12.0  | 10.36  | 2.74  |
| 296 | C-045 | Survived | 24.0  | 10.98  | 4.15  |
| 297 | C-045 | Survived | 48.0  | 7.81   | 2.39  |
| 298 | C-045 | Survived | 72.0  | 9.78   | 2.45  |
| 299 | C-045 | Survived | 120.0 | 10.12  | 2.37  |
| 300 | C-045 | Survived | 168.0 | 5.01   | 2.84  |
| 301 | C-046 | Survived | Field | 13.19  | 7.68  |
| 302 | C-046 | Survived | ED    | 8.44   | 4.87  |
| 303 | C-046 | Survived | 2.0   | 5.57   | 3.64  |
| 304 | C-046 | Survived | 4.0   | 8.01   | 3.32  |
| 305 | C-046 | Survived | 6.0   | 7.54   | 2.90  |
| 306 | C-046 | Survived | 12.0  | 10.30  | 2.46  |
| 307 | C-046 | Survived | 24.0  | 6.92   | 2.54  |
| 308 | C-046 | Survived | 48.0  | 7.72   | 2.43  |
| 309 | C-046 | Survived | 72.0  | 5.90   | 2.23  |
| 310 | C-046 | Survived | 120.0 | 8.13   | 2.32  |
| 311 | C-047 | Survived | 2.0   | 301.27 | 6.76  |
| 312 | C-047 | Survived | 4.0   | 32.40  | 4.65  |

|     |       |          |       |       |       |
|-----|-------|----------|-------|-------|-------|
| 313 | C-047 | Survived | 6.0   | 11.30 | 4.06  |
| 314 | C-047 | Survived | 72.0  | 10.16 | 5.24  |
| 315 | C-047 | Survived | 120.0 | 6.22  | 3.34  |
| 316 | C-048 | Survived | Field | 13.78 | 4.24  |
| 317 | C-048 | Survived | ED    | 11.74 | 3.94  |
| 318 | C-048 | Survived | 2.0   | 2.81  | 3.08  |
| 319 | C-048 | Survived | 4.0   | 7.79  | 2.69  |
| 320 | C-048 | Survived | 6.0   | 8.80  | 2.83  |
| 321 | C-048 | Survived | 24.0  | 5.01  | 2.66  |
| 322 | C-049 | Survived | ED    | 8.87  | 3.07  |
| 323 | C-049 | Survived | 2.0   | 15.69 | 3.83  |
| 324 | C-049 | Survived | 4.0   | 9.47  | 4.30  |
| 325 | C-049 | Survived | 6.0   | 7.48  | 3.08  |
| 326 | C-049 | Survived | 12.0  | 6.56  | 2.50  |
| 327 | C-049 | Survived | 24.0  | 11.93 | 2.20  |
| 328 | C-049 | Survived | 48.0  | 11.30 | 2.32  |
| 329 | C-051 | Survived | 72.0  | 7.78  | 5.22  |
| 330 | C-051 | Survived | Field | 10.78 | 4.75  |
| 331 | C-051 | Survived | ED    | 12.17 | 3.34  |
| 332 | C-051 | Survived | 4.0   | 15.06 | 3.42  |
| 333 | C-051 | Survived | 6.0   | 12.64 | 3.28  |
| 334 | C-051 | Survived | 24.0  | 5.53  | 3.29  |
| 335 | C-052 | Survived | ED    | 97.83 | 11.33 |
| 336 | C-052 | Survived | 2.0   | 14.10 | 4.52  |
| 337 | C-052 | Survived | 4.0   | 13.96 | 3.00  |
| 338 | C-052 | Survived | 6.0   | 12.98 | 2.28  |
| 339 | C-052 | Survived | 12.0  | 13.95 | 2.74  |
| 340 | C-052 | Survived | 24.0  | 7.72  | 2.90  |
| 341 | C-053 | Survived | 48.0  | 7.99  | 4.15  |
| 342 | C-053 | Survived | Field | 13.20 | 3.79  |
| 343 | C-053 | Survived | ED    | 8.40  | 3.56  |
| 344 | C-053 | Survived | 4.0   | 7.10  | 2.56  |
| 345 | C-053 | Survived | 6.0   | 6.64  | 3.60  |
| 346 | C-053 | Survived | 12.0  | 6.23  | 3.76  |
| 347 | C-053 | Survived | 24.0  | 11.50 | 2.91  |
| 348 | C-053 | Survived | 120.0 | 5.91  | 2.64  |
| 349 | C-053 | Survived | 168.0 | 8.65  | 2.49  |
| 350 | C-054 | Survived | Field | 19.20 | 5.60  |
| 351 | C-054 | Survived | ED    | 17.69 | 4.82  |
| 352 | C-054 | Survived | 4.0   | 19.21 | 4.20  |
| 353 | C-054 | Survived | 6.0   | 12.97 | 3.35  |
| 354 | C-054 | Survived | 24.0  | 15.24 | 5.11  |
| 355 | C-054 | Survived | 120.0 | 5.33  | 2.42  |
| 356 | C-054 | Survived | 168.0 | 4.62  | 2.43  |



|     |       |          |       |        |       |
|-----|-------|----------|-------|--------|-------|
| 357 | C-055 | Survived | Field | 26.24  | 4.42  |
| 358 | C-055 | Survived | ED    | 39.69  | 4.37  |
| 359 | C-055 | Survived | 4.0   | 16.54  | 3.32  |
| 360 | C-055 | Survived | 6.0   | 5.90   | 3.09  |
| 361 | C-055 | Survived | 24.0  | 4.12   | 2.73  |
| 362 | C-055 | Survived | 48.0  | 5.66   | 3.06  |
| 363 | C-055 | Survived | 72.0  | 10.70  | 2.96  |
| 364 | C-056 | Survived | ED    | 11.87  | 3.32  |
| 365 | C-056 | Survived | 48.0  | 14.58  | 3.54  |
| 366 | C-056 | Survived | 72.0  | 3.09   | 2.85  |
| 367 | C-057 | Survived | Field | 96.42  | 5.20  |
| 368 | C-057 | Survived | ED    | 39.70  | 5.71  |
| 369 | C-057 | Survived | 2.0   | 5.47   | 5.75  |
| 370 | C-057 | Survived | 4.0   | 7.67   | 4.42  |
| 371 | C-057 | Survived | 6.0   | 10.36  | 3.85  |
| 372 | C-057 | Survived | 12.0  | 8.87   | 2.92  |
| 373 | C-057 | Survived | 24.0  | 6.06   | 3.22  |
| 374 | C-057 | Survived | 48.0  | 7.63   | 3.14  |
| 375 | C-057 | Survived | 72.0  | 7.60   | 2.48  |
| 376 | C-057 | Survived | 120.0 | 6.06   | 2.21  |
| 377 | C-057 | Survived | 168.0 | 6.67   | 2.50  |
| 378 | C-058 | Survived | Field | 8.08   | 6.80  |
| 379 | C-058 | Survived | ED    | 6.94   | 3.91  |
| 380 | C-059 | Dead     | ED    | 271.10 | 10.38 |
| 381 | C-059 | Dead     | 4.0   | 99.10  | 11.04 |
| 382 | C-059 | Dead     | 6.0   | 93.17  | 10.33 |
| 383 | C-060 | Survived | Field | 12.39  | 7.29  |
| 384 | C-060 | Survived | ED    | 6.87   | 2.98  |
| 385 | C-060 | Survived | 2.0   | 5.70   | 2.39  |
| 386 | C-061 | Survived | 6.0   | 14.91  | 3.78  |
| 387 | C-061 | Survived | ED    | 6.73   | 3.77  |
| 388 | C-061 | Survived | 2.0   | 6.56   | 3.61  |
| 389 | C-063 | Survived | Field | 17.16  | 4.53  |
| 390 | C-063 | Survived | ED    | 20.65  | 5.46  |
| 391 | C-063 | Survived | 4.0   | 18.54  | 4.77  |
| 392 | C-063 | Survived | 6.0   | 15.97  | 4.57  |
| 393 | C-063 | Survived | 12.0  | 39.46  | 3.52  |
| 394 | C-063 | Survived | 24.0  | 11.09  | 2.58  |
| 395 | C-063 | Survived | 48.0  | 6.18   | 3.18  |
| 396 | C-063 | Survived | 120.0 | 5.58   | 3.00  |
| 397 | C-063 | Survived | 168.0 | 6.42   | 2.59  |
| 398 | C-064 | Survived | Field | 18.92  | 10.25 |
| 399 | C-064 | Survived | ED    | 12.31  | 6.01  |
| 400 | C-065 | Survived | ED    | 23.03  | 4.66  |

|     |       |          |       |        |       |
|-----|-------|----------|-------|--------|-------|
| 401 | C-065 | Survived | 4.0   | 9.53   | 3.92  |
| 402 | C-065 | Survived | 48.0  | 6.17   | 3.09  |
| 403 | C-065 | Survived | 72.0  | 7.81   | 2.47  |
| 404 | C-065 | Survived | 120.0 | 6.01   | 2.75  |
| 405 | C-066 | Survived | Field | 7.94   | 3.59  |
| 406 | C-066 | Survived | ED    | 9.39   | 3.25  |
| 407 | C-066 | Survived | 4.0   | 13.04  | 3.11  |
| 408 | C-067 | Survived | Field | 9.95   | 3.85  |
| 409 | C-067 | Survived | ED    | 5.62   | 2.84  |
| 410 | C-067 | Survived | 2.0   | 9.11   | 3.17  |
| 411 | C-067 | Survived | 4.0   | 10.79  | 3.28  |
| 412 | C-067 | Survived | 6.0   | 3.34   | 3.15  |
| 413 | C-069 | Survived | 12.0  | 78.17  | 8.44  |
| 414 | C-069 | Survived | 24.0  | 14.23  | 4.15  |
| 415 | C-069 | Survived | 48.0  | 14.14  | 3.21  |
| 416 | C-069 | Survived | 72.0  | 5.26   | 2.56  |
| 417 | C-069 | Survived | 120.0 | 4.74   | 2.87  |
| 418 | C-070 | Dead     | ED    | 548.79 | 16.55 |
| 419 | C-070 | Dead     | 2.0   | 43.42  | 8.08  |
| 420 | C-071 | Survived | Field | 12.87  | 4.60  |
| 421 | C-071 | Survived | ED    | 5.27   | 4.01  |
| 422 | C-071 | Survived | 2.0   | 6.74   | 4.27  |
| 423 | C-071 | Survived | 4.0   | 7.53   | 3.93  |
| 424 | C-071 | Survived | 6.0   | 5.54   | 3.40  |
| 425 | C-071 | Survived | 12.0  | 4.62   | 3.51  |
| 426 | C-071 | Survived | 24.0  | 3.36   | 2.53  |
| 427 | C-071 | Survived | 48.0  | 8.53   | 2.47  |
| 428 | C-071 | Survived | 72.0  | 8.71   | 2.41  |
| 437 | C-073 | Survived | Field | 15.72  | 5.19  |
| 438 | C-073 | Survived | ED    | 5.21   | 2.76  |
| 439 | C-073 | Survived | 4.0   | 8.64   | 2.92  |
| 440 | C-073 | Survived | 6.0   | 4.62   | 3.07  |
| 441 | C-073 | Survived | 12.0  | 5.51   | 2.48  |
| 442 | C-074 | Dead     | ED    | 53.49  | 3.61  |
| 443 | C-074 | Dead     | 4.0   | 186.75 | 7.78  |
| 444 | C-075 | Survived | Field | 22.39  | 4.37  |
| 445 | C-075 | Survived | 2.0   | 10.21  | 3.77  |
| 446 | C-075 | Survived | 4.0   | 8.18   | 3.17  |
| 447 | C-075 | Survived | 6.0   | 6.05   | 2.95  |
| 448 | C-075 | Survived | 12.0  | 10.56  | 2.52  |
| 449 | C-075 | Survived | 24.0  | 13.65  | 2.83  |
| 450 | C-075 | Survived | 48.0  | 6.54   | 2.69  |
| 451 | C-075 | Survived | 72.0  | 4.58   | 2.26  |
| 452 | C-076 | Survived | Field | 46.25  | 4.68  |

|     |       |          |       |        |      |
|-----|-------|----------|-------|--------|------|
| 453 | C-076 | Survived | ED    | 100.14 | 6.00 |
| 454 | C-076 | Survived | 2.0   | 26.70  | 4.24 |
| 455 | C-076 | Survived | 4.0   | 28.21  | 3.59 |
| 456 | C-076 | Survived | 6.0   | 16.48  | 4.27 |
| 457 | C-076 | Survived | 12.0  | 11.31  | 3.78 |
| 458 | C-076 | Survived | 48.0  | 11.07  | 4.30 |
| 459 | C-076 | Survived | 72.0  | 8.23   | 2.70 |
| 460 | C-076 | Survived | 168.0 | 10.56  | 2.61 |
| 461 | C-077 | Survived | Field | 13.52  | 5.45 |
| 462 | C-077 | Survived | ED    | 8.95   | 6.80 |
| 463 | C-077 | Survived | 4.0   | 8.38   | 3.61 |
| 464 | C-077 | Survived | 6.0   | 6.48   | 3.93 |
| 465 | C-077 | Survived | 24.0  | 7.32   | 2.53 |
| 466 | C-077 | Survived | 48.0  | 3.76   | 2.30 |
| 467 | C-077 | Survived | 72.0  | 3.35   | 2.24 |
| 468 | C-077 | Survived | 120.0 | 9.58   | 2.63 |
| 469 | C-078 | Dead     | ED    | 390.76 | 6.84 |
| 470 | C-079 | Survived | Field | 48.35  | 5.11 |
| 471 | C-079 | Survived | ED    | 29.44  | 4.42 |
| 472 | C-079 | Survived | 2.0   | 5.80   | 3.21 |
| 473 | C-079 | Survived | 4.0   | 7.95   | 2.87 |
| 474 | C-079 | Survived | 6.0   | 2.77   | 2.97 |
| 475 | C-079 | Survived | 12.0  | 10.86  | 2.57 |
| 476 | C-079 | Survived | 24.0  | 7.31   | 2.74 |
| 477 | C-079 | Survived | 48.0  | 4.56   | 2.32 |
| 478 | C-079 | Survived | 72.0  | 5.63   | 2.31 |
| 479 | C-080 | Survived | Field | 19.95  | 3.58 |
| 480 | C-080 | Survived | ED    | 20.43  | 4.34 |
| 481 | C-080 | Survived | 2.0   | 7.69   | 3.80 |
| 482 | C-080 | Survived | 4.0   | 10.70  | 3.52 |
| 483 | C-080 | Survived | 6.0   | 12.96  | 3.53 |
| 484 | C-080 | Survived | 12.0  | 8.43   | 2.48 |
| 485 | C-080 | Survived | 24.0  | 12.69  | 2.76 |
| 486 | C-080 | Survived | 48.0  | 9.40   | 2.30 |
| 487 | C-080 | Survived | 72.0  | 7.57   | 2.78 |
| 488 | C-081 | Dead     | Field | 29.78  | 5.00 |
| 489 | C-081 | Dead     | ED    | 23.44  | 4.34 |
| 490 | C-081 | Dead     | 2.0   | 18.01  | 8.58 |
| 491 | C-081 | Dead     | 4.0   | 24.23  | 8.71 |
| 492 | C-081 | Dead     | 6.0   | 116.76 | 9.08 |
| 493 | C-081 | Dead     | 12.0  | 15.95  | 6.91 |
| 494 | C-081 | Dead     | 24.0  | 25.41  | 6.94 |
| 495 | C-081 | Dead     | 48.0  | 8.19   | 4.25 |
| 496 | C-082 | Survived | Field | 45.65  | 5.09 |

|     |       |          |       |        |       |
|-----|-------|----------|-------|--------|-------|
| 497 | C-082 | Survived | ED    | 196.69 | 29.04 |
| 498 | C-082 | Survived | 2.0   | 45.98  | 9.77  |
| 499 | C-082 | Survived | 4.0   | 26.69  | 6.16  |
| 500 | C-082 | Survived | 6.0   | 25.59  | 6.29  |
| 501 | C-082 | Survived | 12.0  | 18.40  | 4.79  |
| 502 | C-082 | Survived | 48.0  | 7.86   | 2.50  |
| 503 | C-082 | Survived | 120.0 | 5.85   | 2.49  |
| 504 | C-082 | Survived | 168.0 | 5.58   | 2.56  |
| 505 | C-083 | Survived | Field | 53.15  | 5.78  |
| 506 | C-083 | Survived | ED    | 17.77  | 4.28  |
| 507 | C-083 | Survived | 4.0   | 9.36   | 5.17  |
| 508 | C-083 | Survived | 6.0   | 6.94   | 5.20  |
| 509 | C-083 | Survived | 12.0  | 11.54  | 3.42  |
| 510 | C-083 | Survived | 24.0  | 26.67  | 5.91  |
| 511 | C-083 | Survived | 48.0  | 5.02   | 3.02  |
| 512 | C-083 | Survived | 72.0  | 8.01   | 2.61  |
| 513 | C-083 | Survived | 120.0 | 10.99  | 2.45  |
| 514 | C-083 | Survived | 168.0 | 8.23   | 2.71  |
| 515 | C-084 | Survived | Field | 101.04 | 6.42  |
| 516 | C-084 | Survived | ED    | 50.37  | 5.76  |
| 517 | C-084 | Survived | 2.0   | 16.15  | 3.24  |
| 518 | C-084 | Survived | 4.0   | 13.22  | 2.91  |
| 519 | C-084 | Survived | 6.0   | 7.50   | 2.56  |
| 520 | C-085 | Survived | ED    | 26.96  | 4.42  |
| 521 | C-085 | Survived | 4     | 14.03  | 4.00  |
| 522 | C-085 | Survived | 6     | 8.90   | 3.70  |
| 523 | C-085 | Survived | 12    | 11.67  | 3.63  |
| 524 | C-085 | Survived | 24    | 8.18   | 2.84  |
| 525 | C-085 | Survived | 48    | 8.26   | 3.06  |
| 526 | C-085 | Survived | 72    | 7.68   | 2.91  |
| 527 | C-085 | Survived | 120   | 10.85  | 2.79  |
| 528 | C-085 | Survived | ED    | 12.57  | 2.76  |
| 529 | C-086 | Dead     | 4     | 201.22 | 11.47 |
| 530 | C-086 | Dead     | 2     | 191.28 | 15.56 |
| 531 | C-087 | Survived | 6     | 14.08  | 5.68  |
| 532 | C-087 | Survived | 12    | 22.37  | 5.54  |
| 533 | C-087 | Survived | 24    | 12.40  | 4.51  |
| 534 | C-087 | Survived | 48    | 10.18  | 3.58  |
| 535 | C-087 | Survived | 72    | 3.80   | 3.20  |
| 536 | C-087 | Survived | 120   | 4.91   | 2.71  |
| 537 | C-087 | Survived | 168   | 8.71   | 3.41  |
| 538 | C-088 | Survived | Field | 47.25  | 8.48  |
| 539 | C-088 | Survived | ED    | 51.19  | 8.30  |
| 540 | C-088 | Survived | 2     | 30.44  | 8.75  |

|     |       |          |       |        |       |
|-----|-------|----------|-------|--------|-------|
| 541 | C-088 | Survived | 4     | 17.16  | 6.33  |
| 542 | C-088 | Survived | 6     | 12.86  | 4.98  |
| 543 | C-088 | Survived | 12    | 5.67   | 3.82  |
| 544 | C-088 | Survived | 24    | 7.86   | 3.30  |
| 545 | C-088 | Survived | 48    | 15.78  | 4.08  |
| 546 | C-088 | Survived | 120   | 8.53   | 2.77  |
| 547 | C-088 | Survived | 168   | 12.23  | 3.10  |
| 548 | C-089 | Dead     | ED    | 259.27 | 16.55 |
| 549 | C-089 | Dead     | 6     | 216.14 | 11.23 |
| 550 | C-090 | Survived | ED    | 9.61   | 3.78  |
| 551 | C-090 | Survived | 4     | 9.52   | 4.94  |
| 552 | C-090 | Survived | 48    | 4.31   | 2.70  |
| 553 | C-091 | Survived | ED    | 110.90 | 7.65  |
| 554 | C-091 | Survived | 2     | 17.76  | 4.17  |
| 555 | C-091 | Survived | 6     | 10.65  | 3.08  |
| 556 | C-091 | Survived | 12    | 10.04  | 3.85  |
| 557 | C-091 | Survived | 48    | 8.43   | 2.77  |
| 558 | C-091 | Survived | 72    | 3.90   | 2.23  |
| 559 | C-093 | Survived | Field | 12.60  | 5.99  |
| 560 | C-093 | Survived | ED    | 14.12  | 5.09  |
| 561 | C-093 | Survived | 4     | 10.77  | 3.36  |
| 562 | C-093 | Survived | 6     | 8.39   | 3.29  |
| 563 | C-093 | Survived | 12    | 9.84   | 2.99  |
| 564 | C-094 | Survived | Field | 23.13  | 5.75  |
| 565 | C-094 | Survived | ED    | 21.82  | 4.40  |
| 566 | C-094 | Survived | 2     | 21.24  | 3.13  |
| 567 | C-094 | Survived | 6     | 3.88   | 3.88  |
| 568 | C-094 | Survived | 12    | 6.13   | 3.90  |
| 569 | C-094 | Survived | 24    | 6.78   | 2.97  |
| 570 | C-094 | Survived | 72    | 4.95   | 2.61  |
| 571 | C-094 | Survived | 120   | 5.40   | 2.51  |
| 572 | C-094 | Survived | 168   | 4.20   | 2.92  |
| 573 | C-098 | Survived | ED    | 36.86  | 4.77  |
| 574 | C-098 | Survived | 2     | 19.33  | 7.09  |
| 575 | C-098 | Survived | 4     | 16.52  | 6.24  |
| 576 | C-098 | Survived | 6     | 16.94  | 6.73  |
| 577 | C-098 | Survived | 12    | 14.14  | 4.31  |
| 578 | C-098 | Survived | 24    | 5.06   | 4.99  |
| 579 | C-098 | Survived | 48    | 6.05   | 4.00  |
| 580 | C-098 | Survived | 72    | 5.23   | 3.05  |
| 581 | C-098 | Survived | 120   | 6.13   | 2.78  |
| 582 | C-098 | Survived | 168   | 9.58   | 2.96  |
| 583 | C-099 | Survived | Field | 18.08  | 4.28  |
| 584 | C-099 | Survived | ED    | 20.07  | 3.63  |

|     |       |          |       |       |      |
|-----|-------|----------|-------|-------|------|
| 585 | C-099 | Survived | 4     | 8.57  | 3.63 |
| 586 | C-099 | Survived | 6     | 9.92  | 3.56 |
| 587 | C-099 | Survived | 12    | 16.33 | 3.26 |
| 588 | C-099 | Survived | 24    | 13.32 | 3.01 |
| 589 | C-099 | Survived | 48    | 5.75  | 2.53 |
| 590 | C-099 | Survived | 72    | 8.84  | 2.52 |
| 591 | C-100 | Survived | Field | 35.08 | 5.89 |
| 592 | C-100 | Survived | 2     | 14.58 | 3.45 |
| 593 | C-100 | Survived | 4     | 11.69 | 3.36 |
| 594 | C-100 | Survived | 6     | 10.61 | 3.63 |
| 595 | C-100 | Survived | 12    | 10.24 | 4.12 |
